# Supplementary material
Source: PubMed Central journal article supplement (PMC5859979)
Supplement: kwx059matsuyamawebmaterialfinal.pdf [file kwx059matsuyamawebmaterialfinal.pdf]

Web Table 1. Detail of each damage level, Iwanuma, Japan, 2010–2013

| Grade     | Criterion                                                                                                                        |
|-----------|----------------------------------------------------------------------------------------------------------------------------------|
| No damage | Not affected.                                                                                                                    |
| Partial   | Under 20% structural damage or inundation below the floor.                                                                       |
| Minor     | 20% to 40% structural damage or inundation above the floor.                                                                      |
| Major     | 40% to 50% structural damage or inundation approximately 1 meter above the floor.                                                |
| Destroyed | Over 50% structural damage, inundation up to ceiling in the first floor, or completely washed away. Uninhabitable beyond repair. |

Web Table 2. The Frequencies of Missing Information according to missing information on number of remaining teeth at baseline (n = 3,567), Iwanuma, Japan; 2010–2013

| Characteristics                            | No. of remaining teeth at baseline |      |                     |      |                      |      |  |
|--------------------------------------------|------------------------------------|------|---------------------|------|----------------------|------|--|
|                                            | Non missing<br>(n = 3,504)         |      | Missing<br>(n = 63) |      | Total<br>(n = 3,567) |      |  |
|                                            | n                                  | %    | n                   | %    | n                    | %    |  |
| <b>Sex</b>                                 |                                    |      |                     |      |                      |      |  |
| Men                                        | 1,539                              | 43.9 | 13                  | 20.6 | 1,552                | 43.5 |  |
| Women                                      | 1,965                              | 56.1 | 50                  | 79.4 | 2,015                | 56.5 |  |
| <b>Age (years-old)</b>                     |                                    |      |                     |      |                      |      |  |
| 65–69                                      | 1,120                              | 32.0 | 7                   | 11.1 | 1,127                | 31.6 |  |
| 70–74                                      | 994                                | 28.4 | 6                   | 9.5  | 1,000                | 28.0 |  |
| 75–79                                      | 736                                | 21.0 | 25                  | 39.7 | 761                  | 21.3 |  |
| 80–84                                      | 441                                | 12.6 | 18                  | 28.6 | 459                  | 12.9 |  |
| ≥85                                        | 213                                | 6.1  | 7                   | 11.1 | 220                  | 6.2  |  |
| <b>Income <sup>a</sup></b>                 |                                    |      |                     |      |                      |      |  |
| Low                                        | 997                                | 28.5 | 19                  | 30.2 | 1,016                | 28.5 |  |
| Middle                                     | 1,118                              | 31.9 | 17                  | 27.0 | 1,135                | 31.8 |  |
| High                                       | 697                                | 19.9 | 9                   | 14.3 | 706                  | 19.8 |  |
| Missing                                    | 692                                | 19.7 | 18                  | 28.6 | 710                  | 19.9 |  |
| <b>Years of education</b>                  |                                    |      |                     |      |                      |      |  |
| ≤9                                         | 1,210                              | 34.5 | 20                  | 31.7 | 1,230                | 34.5 |  |
| 10–12                                      | 1,471                              | 42.0 | 15                  | 23.8 | 1,486                | 41.7 |  |
| ≥13                                        | 703                                | 20.1 | 10                  | 15.9 | 713                  | 20.0 |  |
| Missing                                    | 120                                | 3.4  | 18                  | 28.6 | 138                  | 3.9  |  |
| <b>Comorbid conditions before disaster</b> |                                    |      |                     |      |                      |      |  |
| No                                         | 1,179                              | 33.6 | 12                  | 19.0 | 1,191                | 33.4 |  |
| Yes                                        | 2,257                              | 64.4 | 31                  | 49.2 | 2,288                | 64.1 |  |
| Missing                                    | 68                                 | 1.9  | 20                  | 31.7 | 88                   | 2.5  |  |
| <b>Loss of loved ones by the disaster</b>  |                                    |      |                     |      |                      |      |  |
| Lost                                       | 1,310                              | 37.4 | 19                  | 30.2 | 1,329                | 37.3 |  |
| No lost                                    | 2,124                              | 60.6 | 43                  | 68.3 | 2,167                | 60.8 |  |
| Missing                                    | 70                                 | 2.0  | 1                   | 1.6  | 71                   | 2.0  |  |
| <b>Subjective economic deterioration</b>   |                                    |      |                     |      |                      |      |  |
| No change/improved                         | 2,604                              | 74.3 | 48                  | 76.2 | 2,652                | 74.3 |  |
| Became partially worse                     | 572                                | 16.3 | 11                  | 17.5 | 583                  | 16.3 |  |
| Became worse                               | 243                                | 6.9  | 3                   | 4.8  | 246                  | 6.9  |  |
| Missing                                    | 85                                 | 2.4  | 1                   | 1.6  | 86                   | 2.4  |  |
| <b>House damage</b>                        |                                    |      |                     |      |                      |      |  |
| No damage                                  | 1,400                              | 40.0 | 23                  | 36.5 | 1,423                | 39.9 |  |
| Partial                                    | 1,468                              | 41.9 | 28                  | 44.4 | 1,496                | 41.9 |  |
| Minor                                      | 250                                | 7.1  | 7                   | 11.1 | 257                  | 7.2  |  |

|                                       |       |      |    |      |       |      |
|---------------------------------------|-------|------|----|------|-------|------|
| Major                                 | 130   | 3.7  | 1  | 1.6  | 131   | 3.7  |
| Destroyed                             | 156   | 4.5  | 3  | 4.8  | 159   | 4.5  |
| Missing                               | 100   | 2.9  | 1  | 1.6  | 101   | 2.8  |
| Psychological distress after disaster |       |      |    |      |       |      |
| None                                  | 1,980 | 56.5 | 36 | 57.1 | 2,016 | 56.5 |
| Moderate                              | 1,221 | 34.8 | 17 | 27.0 | 1,238 | 34.7 |
| Severe                                | 151   | 4.3  | 6  | 9.5  | 157   | 4.4  |
| Missing                               | 152   | 4.3  | 4  | 6.3  | 156   | 4.4  |

---

<sup>a</sup> Income was tertiled using all participants.

Web Table 3. Covariate Distribution According to Actual Disaster Damage and Instrumental Variable (n = 2,332), Iwanuma, Japan, 2010–2013.

| Characteristics                   | Actual disaster damage |                             |                           |                |            |            |              |                | Instrumental variable                |                         |
|-----------------------------------|------------------------|-----------------------------|---------------------------|----------------|------------|------------|--------------|----------------|--------------------------------------|-------------------------|
|                                   | Economical damage      |                             |                           | House damage   |            |            |              |                | Distance from coastline <sup>a</sup> |                         |
|                                   | Became worse<br>%      | Became partially worse<br>% | No change / improved<br>% | Destroyed<br>% | Major<br>% | Minor<br>% | Partial<br>% | No damage<br>% | Near to coastline<br>%               | Far from coastline<br>% |
| Subjective economic deterioration |                        |                             |                           |                |            |            |              |                |                                      |                         |
| No change/improved                | 0.0                    | 0.0                         | 100.0                     | 26.2           | 34.5       | 48.2       | 77.6         | 90.2           | 72.0                                 | 82.2                    |
| Became partially worse            | 0.0                    | 100.0                       | 0.0                       | 36.9           | 39.3       | 37.3       | 17.8         | 7.6            | 18.7                                 | 14.3                    |
| Became worse                      | 100.0                  | 0.0                         | 0.0                       | 36.9           | 26.2       | 14.5       | 4.6          | 2.2            | 9.2                                  | 3.5                     |
| House damage                      |                        |                             |                           |                |            |            |              |                |                                      |                         |
| No damage                         | 14.5                   | 19.4                        | 48.7                      | 0.0            | 0.0        | 0.0        | 0.0          | 100.0          | 38.3                                 | 44.9                    |
| Partial                           | 32.4                   | 47.6                        | 44.0                      | 0.0            | 0.0        | 0.0        | 100.0        | 0.0            | 36.6                                 | 50.5                    |
| Minor                             | 16.6                   | 16.2                        | 4.4                       | 0.0            | 0.0        | 100.0      | 0.0          | 0.0            | 11.1                                 | 3.5                     |
| Major                             | 15.2                   | 8.6                         | 1.6                       | 0.0            | 100.0      | 0.0        | 0.0          | 0.0            | 6.6                                  | 0.9                     |
| Destroyed                         | 21.4                   | 8.1                         | 1.2                       | 100.0          | 0.0        | 0.0        | 0.0          | 0.0            | 7.4                                  | 0.2                     |
| Sex                               |                        |                             |                           |                |            |            |              |                |                                      |                         |
| Men                               | 51.0                   | 52.1                        | 47.9                      | 46.4           | 51.2       | 45.2       | 47.6         | 50.7           | 47.7                                 | 49.8                    |
| Women                             | 49.0                   | 47.9                        | 52.1                      | 53.6           | 48.8       | 54.8       | 52.4         | 49.3           | 52.3                                 | 50.2                    |
| Age                               |                        |                             |                           |                |            |            |              |                |                                      |                         |
| 65–69                             | 44.1                   | 43.7                        | 37.2                      | 42.9           | 40.5       | 45.2       | 38.0         | 37.9           | 37.6                                 | 39.8                    |
| 70–74                             | 31.0                   | 29.3                        | 29.1                      | 34.5           | 25.0       | 24.7       | 29.3         | 29.9           | 28.9                                 | 29.6                    |
| 75–79                             | 15.2                   | 17.0                        | 19.8                      | 16.7           | 14.3       | 18.1       | 20.3         | 18.5           | 19.7                                 | 18.4                    |
| 80–84                             | 7.6                    | 6.8                         | 9.8                       | 2.4            | 14.3       | 8.4        | 8.9          | 9.8            | 9.6                                  | 8.8                     |
| 85+                               | 2.1                    | 3.1                         | 4.1                       | 3.6            | 6.0        | 3.6        | 3.5          | 4.0            | 4.3                                  | 3.4                     |
| Income                            |                        |                             |                           |                |            |            |              |                |                                      |                         |

|                                       |                   |      |      |      |      |      |      |      |      |      |      |
|---------------------------------------|-------------------|------|------|------|------|------|------|------|------|------|------|
|                                       | Low               | 65.5 | 46.3 | 29.3 | 57.1 | 48.8 | 33.1 | 31.6 | 34.1 | 37.5 | 31.5 |
|                                       | Middle            | 21.4 | 28.3 | 35.1 | 21.4 | 27.4 | 30.1 | 34.8 | 33.4 | 30.9 | 35.1 |
|                                       | High              | 13.1 | 25.4 | 35.7 | 21.4 | 23.8 | 36.7 | 33.6 | 32.5 | 31.7 | 33.4 |
| Years of education                    |                   |      |      |      |      |      |      |      |      |      |      |
|                                       | <9                | 53.1 | 39.8 | 26.3 | 63.1 | 53.6 | 38.6 | 26.9 | 27.3 | 35.3 | 25.5 |
|                                       | 10–19             | 35.9 | 42.9 | 48.2 | 33.3 | 32.1 | 37.3 | 48.2 | 48.8 | 42.9 | 49.9 |
|                                       | 13+               | 11.0 | 17.3 | 25.5 | 3.6  | 14.3 | 24.1 | 24.9 | 23.9 | 21.8 | 24.6 |
| Comorbid status before disaster       |                   |      |      |      |      |      |      |      |      |      |      |
|                                       | No                | 32.4 | 31.9 | 35.6 | 35.7 | 27.4 | 33.7 | 33.9 | 36.4 | 33.8 | 35.7 |
|                                       | Yes               | 67.6 | 68.1 | 64.4 | 64.3 | 72.6 | 66.3 | 66.1 | 63.6 | 66.2 | 64.3 |
| Loss of relatives/friends             |                   |      |      |      |      |      |      |      |      |      |      |
|                                       | Lost              | 62.1 | 50.0 | 34.1 | 83.3 | 44.0 | 54.8 | 37.9 | 31.8 | 43.3 | 34.1 |
|                                       | No lost           | 37.9 | 50.0 | 65.9 | 16.7 | 56.0 | 45.2 | 62.1 | 68.2 | 56.7 | 65.9 |
| Psychological distress after disaster |                   |      |      |      |      |      |      |      |      |      |      |
|                                       | No distress       | 33.1 | 47.1 | 66.2 | 32.1 | 52.4 | 54.8 | 58.9 | 67.6 | 57.7 | 64.0 |
|                                       | Moderate distress | 52.4 | 47.9 | 30.6 | 58.3 | 45.2 | 39.2 | 36.4 | 29.4 | 38.3 | 31.6 |
|                                       | Severe distress   | 14.5 | 5.0  | 3.2  | 9.5  | 2.4  | 6.0  | 4.7  | 3.1  | 4.0  | 4.4  |

<sup>a</sup> divided by median

Web Figure 1. Covariate Balance (Bias Component) by Levels of the Treatment and Levels of the Proposed Instrument, Iwanuma, Japan, 2010-2013; Scaled with Scaling Factor Described in Jackson 2015; a Covariate is Balanced When the Bias Component Has a Value of Zero (x-axis).

Housing damage (ref. no damage)

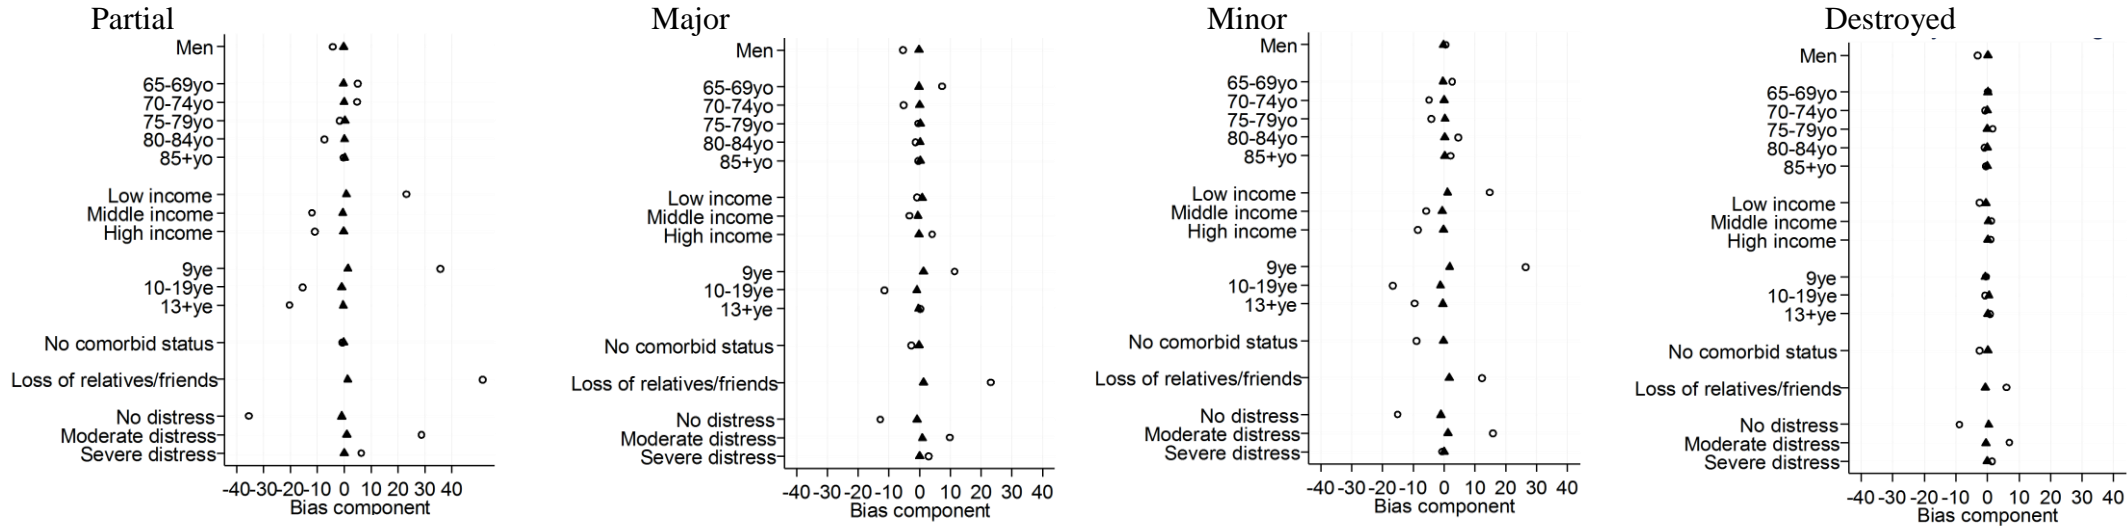

Subjective economic deterioration (ref. no change/improved)

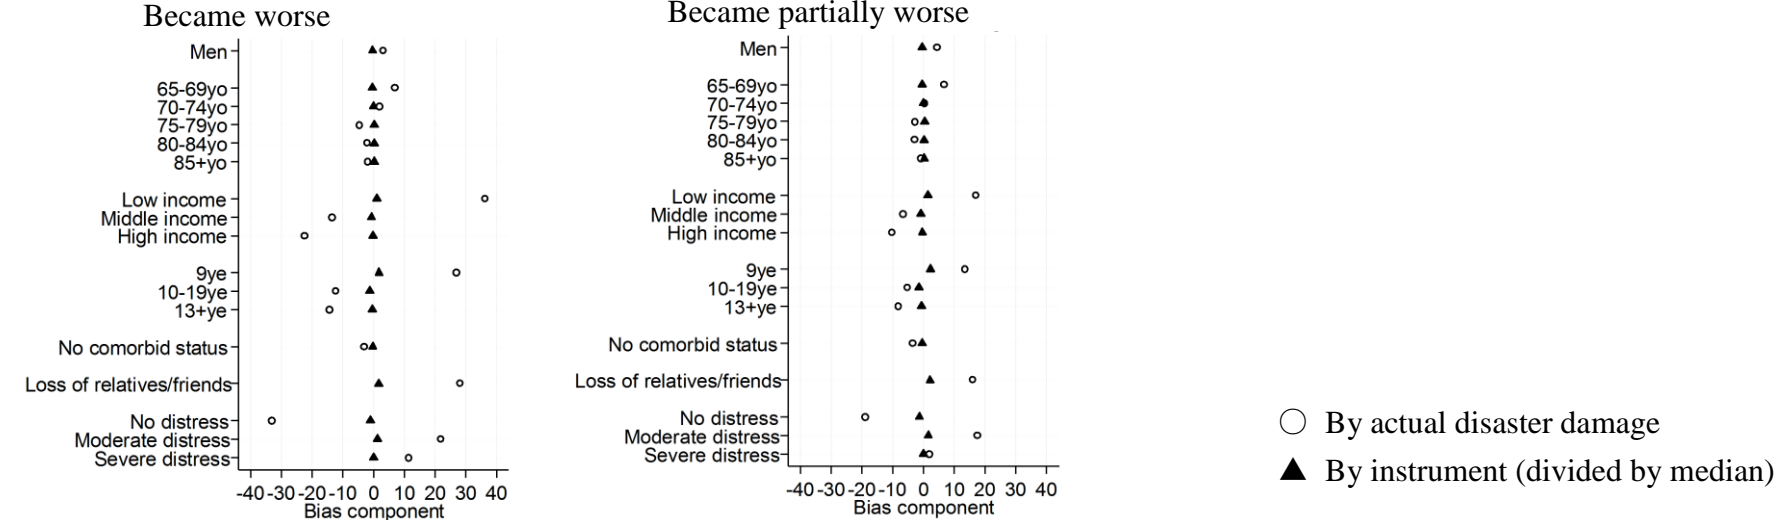

○ By actual disaster damage  
 ▲ By instrument (divided by median)

Web Table 4. Association between Subjective Economic Deterioration and Tooth Loss, Instrumental Variable Analyses with 2SLS after Applying Multiple Imputations (n = 3,039), Iwanuma, Japan, 2010–2013

| Variables                                                                        | 2SLS first stage |                | 2SLS second stage |               |
|----------------------------------------------------------------------------------|------------------|----------------|-------------------|---------------|
|                                                                                  | Coef.            | 95%CI          | Coef.             | 95%CI         |
| Subjective economic deterioration:<br>no change/improved (1) to Became worse (3) |                  |                | 0.480             | 0.043, 0.918  |
| Distance from coastline (km <sup>-1</sup> ) <sup>a</sup>                         | 0.314            | 0.263, 0.365   |                   |               |
| Sex                                                                              |                  |                |                   |               |
| Men                                                                              | ref.             | –              | ref.              | –             |
| Women                                                                            | –0.051           | –0.090, –0.012 | –0.095            | –0.225, 0.036 |
| Age (years-old)                                                                  |                  |                |                   |               |
| 65–69                                                                            | ref.             | –              | ref.              | –             |
| 70–74                                                                            | –0.044           | –0.093, 0.004  | 0.180             | 0.014, 0.345  |
| 75–79                                                                            | –0.101           | –0.156, –0.047 | 0.237             | 0.049, 0.424  |
| 80–84                                                                            | –0.122           | –0.192, –0.053 | 0.302             | 0.073, 0.531  |
| ≥85                                                                              | –0.135           | –0.235, –0.034 | 0.616             | 0.325, 0.907  |
| Income before disaster (tertile categories)                                      |                  |                |                   |               |
| Low                                                                              | ref.             | –              | ref.              | –             |
| Middle                                                                           | –0.159           | –0.211, –0.108 | –0.113            | –0.304, 0.079 |
| High                                                                             | –0.180           | –0.233, –0.127 | –0.083            | –0.275, 0.109 |
| Years of education                                                               |                  |                |                   |               |
| ≤9                                                                               | ref.             | –              | ref.              | –             |
| 10–12                                                                            | –0.083           | –0.131, –0.035 | –0.060            | –0.221, 0.101 |
| ≥13                                                                              | –0.119           | –0.176, –0.062 | 0.012             | –0.186, 0.210 |
| Comorbid conditions before disaster                                              |                  |                |                   |               |
| No                                                                               | ref.             | –              | ref.              | –             |
| Yes                                                                              | 0.021            | –0.021, 0.063  | –0.107            | –0.245, 0.030 |
| Loss of loved ones by the disaster                                               |                  |                |                   |               |
| No lost                                                                          | ref.             | –              | ref.              | –             |
| Lost                                                                             | 0.133            | 0.092, 0.174   | –0.133            | –0.289, 0.022 |
| Psychological distress after disaster                                            |                  |                |                   |               |
| None                                                                             | ref.             | –              | ref.              | –             |
| Moderate                                                                         | 0.188            | 0.146, 0.230   | 0.093             | –0.069, 0.255 |
| Severe                                                                           | 0.394            | 0.294, 0.493   | –0.006            | –0.361, 0.349 |

2SLS, two-step least-square; CI, confidence interval ; Coef. coefficient

<sup>a</sup> F-statistic in first stage=144.33

Web Table 5. Association between Housing Damage and Tooth Loss, Instrumental Variable Analyses with 2SLS after Applying Multiple Imputations (n = 3,039), Iwanuma, Japan, 2010–2013

| Variables                                                | 2SLS first stage |                | 2SLS second stage |                |
|----------------------------------------------------------|------------------|----------------|-------------------|----------------|
|                                                          | Coef.            | 95%CI          | Coef.             | 95%CI          |
| Housing damage:                                          |                  |                |                   |                |
| no damage (1) to destroyed (5)                           |                  |                | 0.103             | 0.011, 0.196   |
| Distance from coastline (km <sup>-1</sup> ) <sup>a</sup> | 1.463            | 1.392, 1.535   |                   |                |
| Sex                                                      |                  |                |                   |                |
| Men                                                      | ref.             | –              | ref.              | –              |
| Women                                                    | –0.003           | –0.059, 0.053  | –0.119            | –0.247, 0.008  |
| Age (years-old)                                          |                  |                |                   |                |
| 65–69                                                    | ref.             | –              | ref.              | –              |
| 70–74                                                    | –0.083           | –0.152, –0.013 | 0.167             | 0.004, 0.330   |
| 75–79                                                    | –0.025           | –0.102, 0.052  | 0.190             | 0.010, 0.370   |
| 80–84                                                    | –0.078           | –0.175, 0.020  | 0.250             | 0.031, 0.470   |
| ≥85                                                      | –0.138           | –0.279, 0.004  | 0.565             | 0.283, 0.847   |
| Income before disaster (tertile categories)              |                  |                |                   |                |
| Low                                                      | ref.             | –              | ref.              | –              |
| Middle                                                   | –0.030           | –0.100, 0.039  | –0.187            | –0.360, –0.013 |
| High                                                     | 0.022            | –0.048, 0.093  | –0.172            | –0.344, –0.001 |
| Years of education                                       |                  |                |                   |                |
| ≤9                                                       | ref.             | –              | ref.              | –              |
| 10–12                                                    | –0.071           | –0.138, –0.005 | –0.092            | –0.244, 0.060  |
| ≥13                                                      | –0.043           | –0.124, 0.037  | –0.042            | –0.226, 0.143  |
| Comorbid conditions before disaster                      |                  |                |                   |                |
| No                                                       | ref.             | –              | ref.              | –              |
| Yes                                                      | 0.025            | –0.034, 0.085  | –0.100            | –0.236, 0.036  |
| Loss of loved ones by the disaster                       |                  |                |                   |                |
| No lost                                                  | ref.             | –              | ref.              | –              |
| Lost                                                     | 0.197            | 0.140, 0.255   | –0.089            | –0.227, 0.049  |
| Psychological distress after disaster                    |                  |                |                   |                |
| None                                                     | ref.             | –              | ref.              | –              |
| Moderate                                                 | 0.153            | 0.094, 0.212   | 0.169             | 0.034, 0.305   |
| Severe                                                   | 0.205            | 0.066, 0.343   | 0.163             | –0.138, 0.464  |

2SLS, two-step least-square; CI, confidence interval ; Coef. coefficient

<sup>a</sup> F-statistic in first stage=1622.93



Web Table 6. Association between Subjective Economic Deterioration as Categorical Variable and Tooth Loss, after Applying Multiple Imputations (n= 3,039), Iwanuma, Japan, 2010–2013

| Variables                                   | Multivariable probit regression<br>(without IV) |                |        | APE            |  |
|---------------------------------------------|-------------------------------------------------|----------------|--------|----------------|--|
|                                             | Coef.                                           | 95% CI         | Pr.    | 95% CI         |  |
| Subjective economic deterioration           |                                                 |                |        |                |  |
| No change/improved                          | ref.                                            | –              | ref.   | –              |  |
| Became partially worse                      | 0.127                                           | –0.042, 0.295  | 0.022  | –0.009, 0.052  |  |
| Became worse                                | 0.124                                           | –0.126, 0.373  | 0.021  | –0.024, 0.067  |  |
| Sex                                         |                                                 |                |        |                |  |
| Men                                         | ref.                                            | –              | ref.   | –              |  |
| Women                                       | –0.113                                          | –0.241, 0.014  | –0.019 | –0.040, 0.003  |  |
| Age (years-old)                             |                                                 |                |        |                |  |
| 65–69                                       | ref.                                            | –              | ref.   | –              |  |
| 70–74                                       | 0.162                                           | –0.000, 0.325  | 0.025  | –0.000, 0.050  |  |
| 75–79                                       | 0.194                                           | 0.013, 0.374   | 0.030  | 0.001, 0.059   |  |
| 80–84                                       | 0.248                                           | 0.029, 0.467   | 0.040  | 0.002, 0.078   |  |
| ≥85                                         | 0.561                                           | 0.280, 0.842   | 0.110  | 0.042, 0.179   |  |
| Income before disaster (tertile categories) |                                                 |                |        |                |  |
| Low                                         | ref.                                            | –              | ref.   | –              |  |
| Middle                                      | –0.182                                          | –0.356, –0.008 | –0.031 | –0.059, –0.002 |  |
| High                                        | –0.161                                          | –0.333, 0.012  | –0.027 | –0.056, 0.002  |  |
| Years of education                          |                                                 |                |        |                |  |
| ≤9                                          | ref.                                            | –              | ref.   | –              |  |
| 10–12                                       | –0.110                                          | –0.260, 0.040  | –0.018 | –0.043, 0.007  |  |
| ≥13                                         | –0.053                                          | –0.236, 0.130  | –0.009 | –0.040, 0.022  |  |
| Comorbid conditions before disaster         |                                                 |                |        |                |  |
| No                                          | ref.                                            | –              | ref.   | –              |  |
| Yes                                         | –0.097                                          | –0.233, 0.038  | –0.016 | –0.040, 0.007  |  |
| Loss of loved ones by the disaster          |                                                 |                |        |                |  |
| Not lost                                    | ref.                                            | –              | ref.   | –              |  |
| Lost                                        | –0.063                                          | –0.197, 0.070  | –0.010 | –0.032, 0.011  |  |
| Psychological distress after disaster       |                                                 |                |        |                |  |
| None                                        | ref.                                            | –              | ref.   | –              |  |
| Moderate                                    | 0.172                                           | 0.036, 0.308   | 0.029  | 0.006, 0.052   |  |
| Severe                                      | 0.169                                           | –0.133, 0.471  | 0.028  | –0.027, 0.084  |  |

APE, average partial effect; CI, confidence interval; Coef. coefficient; Pr. probability; ref., reference

Web Table 7. Association between Housing Damage as Categorical Variable and Tooth Loss, after Applying Multiple Imputations (n= 3,039), Iwanuma, Japan, 2010–2013

| Variables                                   | Multivariable probit regression<br>(without IV) |                |        | APE            |  |
|---------------------------------------------|-------------------------------------------------|----------------|--------|----------------|--|
|                                             | Coef.                                           | 95%CI          | Coef.  | 95%CI          |  |
| Housing damage                              |                                                 |                |        |                |  |
| No damage                                   | ref.                                            | –              | ref.   | –              |  |
| Partial                                     | 0.011                                           | –0.130, 0.152  | 0.002  | –0.021, 0.024  |  |
| Minor                                       | 0.236                                           | 0.001, 0.471   | 0.043  | –0.004, 0.090  |  |
| Major                                       | –0.012                                          | –0.357, 0.332  | –0.002 | –0.055, 0.052  |  |
| Destroyed                                   | 0.292                                           | –0.015, 0.600  | 0.055  | –0.011, 0.122  |  |
| Sex                                         |                                                 |                |        |                |  |
| Men                                         | ref.                                            | –              | ref.   | –              |  |
| Women                                       | –0.120                                          | –0.248, 0.008  | –0.020 | –0.041, 0.001  |  |
| Age (years-old)                             |                                                 |                |        |                |  |
| 65–69                                       | ref.                                            | –              | ref.   | –              |  |
| 70–74                                       | 0.165                                           | 0.002, 0.328   | 0.025  | 0.000, 0.050   |  |
| 75–79                                       | 0.187                                           | 0.007, 0.367   | 0.029  | 0.000, 0.058   |  |
| 80–84                                       | 0.250                                           | 0.031, 0.469   | 0.040  | 0.002, 0.079   |  |
| ≥85                                         | 0.562                                           | 0.281, 0.842   | 0.110  | 0.042, 0.179   |  |
| Income before disaster (tertile categories) |                                                 |                |        |                |  |
| Low                                         | ref.                                            | –              | ref.   | –              |  |
| Middle                                      | –0.187                                          | –0.360, –0.014 | –0.031 | –0.060, –0.003 |  |
| High                                        | –0.176                                          | –0.348, –0.004 | –0.030 | –0.058, –0.001 |  |
| Years of education                          |                                                 |                |        |                |  |
| ≤9                                          | ref.                                            | –              | ref.   | –              |  |
| 10–12                                       | –0.102                                          | –0.252, 0.049  | –0.017 | –0.042, 0.008  |  |
| ≥13                                         | –0.049                                          | –0.233, 0.134  | –0.008 | –0.040, 0.023  |  |
| Comorbid conditions before disaster         |                                                 |                |        |                |  |
| No                                          | ref.                                            | –              | ref.   | –              |  |
| Yes                                         | –0.094                                          | –0.230, 0.042  | –0.016 | –0.039, 0.007  |  |
| Loss of loved ones by the disaster          |                                                 |                |        |                |  |
| Not lost                                    | ref.                                            | –              | ref.   | –              |  |
| Lost                                        | –0.050                                          | –0.210, 0.110  | –0.007 | –0.031, 0.016  |  |
| Psychological distress after disaster       |                                                 |                |        |                |  |
| None                                        | ref.                                            | –              | ref.   | –              |  |
| Moderate                                    | 0.179                                           | 0.045, 0.314   | 0.030  | 0.007, 0.053   |  |
| Severe                                      | 0.173                                           | –0.127, 0.473  | 0.029  | –0.026, 0.084  |  |

APE, average partial effect; CI, confidence interval; Coef. coefficient; Pr. probability; ref., reference



|                                       |          |        |               |       |              |        |               |        |               |
|---------------------------------------|----------|--------|---------------|-------|--------------|--------|---------------|--------|---------------|
|                                       | No lost  | ref.   | –             | ref.  | –            | ref.   | –             | ref.   | –             |
|                                       | Lost     | –0.046 | –0.205, 0.113 | 0.126 | 0.081, 0.171 | –0.116 | –0.292, 0.061 | –0.018 | –0.047, 0.011 |
| Psychological distress after disaster |          |        |               |       |              |        |               |        |               |
|                                       | None     | ref.   | –             | ref.  | –            | ref.   | –             | ref.   | –             |
|                                       | Moderate | 0.134  | –0.027, 0.295 | 0.167 | 0.121, 0.213 | 0.053  | –0.134, 0.240 | 0.008  | –0.020, 0.037 |
|                                       | Severe   | 0.228  | –0.119, 0.575 | 0.375 | 0.267, 0.483 | 0.052  | –0.352, 0.456 | 0.008  | –0.055, 0.071 |

APE, average partial effect; CI, confidence interval; CML, conditional maximum likelihood; Coef. coefficient; IV, instrumental variable; Pr. probability; ref., reference

<sup>a</sup> F-statistic in first stage=144.33



|                                       |          |        |               |       |              |        |               |        |               |
|---------------------------------------|----------|--------|---------------|-------|--------------|--------|---------------|--------|---------------|
|                                       | No lost  | ref.   | –             | ref.  | –            | ref.   | –             | ref.   | –             |
|                                       | Lost     | –0.042 | –0.202, 0.117 | 0.164 | 0.101, 0.227 | –0.062 | –0.224, 0.100 | –0.009 | –0.033, 0.015 |
| Psychological distress after disaster |          |        |               |       |              |        |               |        |               |
|                                       | None     | ref.   | –             | ref.  | –            | ref.   | –             | ref.   | –             |
|                                       | Moderate | 0.148  | –0.011, 0.307 | 0.143 | 0.078, 0.208 | 0.135  | –0.026, 0.295 | 0.020  | –0.004, 0.044 |
|                                       | Severe   | 0.256  | –0.089, 0.602 | 0.231 | 0.079, 0.384 | 0.233  | –0.115, 0.581 | 0.035  | –0.017, 0.086 |

APE, average partial effect; CI, confidence interval; CML, conditional maximum likelihood; Coef. coefficient; IV, instrumental variable; Pr. probability; ref., reference

<sup>a</sup> F-statistic in first stage=1622.93

Web Table 10. Association between Subjective Economic Deterioration as Categorical Variable and Tooth Loss with Complete Case (n = 2,332), Iwanuma, Japan, 2010–2013

| Variables                                   | Multivariable probit regression<br>(without IV) |                |        | APE            |  |
|---------------------------------------------|-------------------------------------------------|----------------|--------|----------------|--|
|                                             | Coef.                                           | 95%CI          | Pr.    | 95%CI          |  |
| Subjective economic deterioration           |                                                 |                |        |                |  |
| No change/improved                          | ref.                                            | –              | ref.   | –              |  |
| Became partially worse                      | 0.156                                           | –0.045, 0.357  | 0.024  | –0.009, 0.057  |  |
| Became worse                                | 0.220                                           | –0.074, 0.513  | 0.035  | –0.018, 0.089  |  |
| Sex                                         |                                                 |                |        |                |  |
| Men                                         | ref.                                            | –              | ref.   | –              |  |
| Women                                       | –0.157                                          | –0.309, –0.004 | –0.023 | –0.046, –0.001 |  |
| Age (years-old)                             |                                                 |                |        |                |  |
| 65–69                                       | ref.                                            | –              | ref.   | –              |  |
| 70–74                                       | 0.191                                           | 0.003, 0.379   | 0.027  | 0.000, 0.054   |  |
| 75–79                                       | 0.137                                           | –0.081, 0.355  | 0.018  | –0.012, 0.049  |  |
| 80–84                                       | 0.226                                           | –0.048, 0.499  | 0.032  | –0.011, 0.076  |  |
| ≥85                                         | 0.630                                           | 0.290, 0.969   | 0.118  | 0.036, 0.201   |  |
| Income before disaster (tertile categories) |                                                 |                |        |                |  |
| Low                                         | ref.                                            | –              | ref.   | –              |  |
| Middle                                      | –0.162                                          | –0.347, 0.024  | –0.025 | –0.053, 0.004  |  |
| High                                        | –0.159                                          | –0.349, 0.032  | –0.024 | –0.053, 0.005  |  |
| Years of education                          |                                                 |                |        |                |  |
| ≤9                                          | ref.                                            | –              | ref.   | –              |  |
| 10–12                                       | –0.065                                          | –0.244, 0.115  | –0.010 | –0.036, 0.017  |  |
| ≥13                                         | 0.000                                           | –0.214, 0.214  | 0.000  | –0.033, 0.033  |  |
| Comorbid conditions before disaster         |                                                 |                |        |                |  |
| No                                          | ref.                                            | –              | ref.   | –              |  |
| Yes                                         | –0.078                                          | –0.237, 0.082  | –0.012 | –0.036, 0.013  |  |
| Loss of loved ones by the disaster          |                                                 |                |        |                |  |
| No lost                                     | ref.                                            | –              | ref.   | –              |  |
| Lost                                        | –0.047                                          | –0.206, 0.112  | –0.007 | –0.030, 0.016  |  |
| Psychological distress after disaster       |                                                 |                |        |                |  |
| None                                        | ref.                                            | –              | ref.   | –              |  |
| Moderate                                    | 0.132                                           | –0.029, 0.293  | 0.020  | –0.005, 0.044  |  |
| Severe                                      | 0.231                                           | –0.117, 0.578  | 0.037  | –0.026, 0.099  |  |

APE, average partial effect; CI, confidence interval; Coef. coefficient; Pr. probability; ref., reference

Web Table 11. Association between Housing damage as Categorical Variable and Tooth Loss with Complete Case (n = 2,332), Iwanuma, Japan, 2010–2013

| Variables                                   | Multivariable probit regression<br>(without IV) |                |        | APE            |  |
|---------------------------------------------|-------------------------------------------------|----------------|--------|----------------|--|
|                                             | Coef.                                           | 95%CI          | Pr.    | 95%CI          |  |
| Housing damage                              |                                                 |                |        |                |  |
| No damage                                   | ref.                                            | –              | ref.   | –              |  |
| Partial                                     | –0.015                                          | –0.180, 0.149  | –0.002 | –0.026, 0.021  |  |
| Minor                                       | 0.086                                           | –0.213, 0.385  | 0.013  | –0.034, 0.061  |  |
| Major                                       | 0.054                                           | –0.342, 0.451  | 0.008  | –0.053, 0.069  |  |
| Destroyed                                   | 0.337                                           | –0.029, 0.704  | 0.061  | –0.017, 0.138  |  |
| Sex                                         |                                                 |                |        |                |  |
| Men                                         | ref.                                            | –              | ref.   | –              |  |
| Women                                       | –0.166                                          | –0.319, –0.014 | –0.025 | –0.047, –0.002 |  |
| Age (years-old)                             |                                                 |                |        |                |  |
| 65–69                                       | ref.                                            | –              | ref.   | –              |  |
| 70–74                                       | 0.184                                           | –0.004, 0.372  | 0.026  | –0.001, 0.053  |  |
| 75–79                                       | 0.129                                           | –0.089, 0.346  | 0.017  | –0.013, 0.048  |  |
| 80–84                                       | 0.217                                           | –0.056, 0.491  | 0.031  | –0.012, 0.074  |  |
| ≥85                                         | 0.615                                           | 0.277, 0.953   | 0.115  | 0.034, 0.197   |  |
| Income before disaster (tertile categories) |                                                 |                |        |                |  |
| Low                                         | ref.                                            | –              | ref.   | –              |  |
| Middle                                      | –0.174                                          | –0.359, 0.010  | –0.027 | –0.055, 0.001  |  |
| High                                        | –0.179                                          | –0.368, 0.010  | –0.027 | –0.056, 0.001  |  |
| Years of education                          |                                                 |                |        |                |  |
| ≤9                                          | ref.                                            | –              | ref.   | –              |  |
| 10–12                                       | –0.059                                          | –0.240, 0.121  | –0.009 | –0.035, 0.018  |  |
| ≥13                                         | 0.001                                           | –0.214, 0.217  | 0.000  | –0.033, 0.033  |  |
| Comorbid conditions before disaster         |                                                 |                |        |                |  |
| No                                          | ref.                                            | –              | ref.   | –              |  |
| Yes                                         | –0.072                                          | –0.231, 0.087  | –0.011 | –0.035, 0.013  |  |
| Loss of loved ones by the disaster          |                                                 |                |        |                |  |
| No lost                                     | ref.                                            | –              | ref.   | –              |  |
| Lost                                        | –0.050                                          | –0.210, 0.110  | –0.007 | –0.031, 0.016  |  |
| Psychological distress after disaster       |                                                 |                |        |                |  |
| None                                        | ref.                                            | –              | ref.   | –              |  |
| Moderate                                    | 0.148                                           | –0.011, 0.308  | 0.022  | –0.002, 0.047  |  |
| Severe                                      | 0.247                                           | –0.101, 0.595  | 0.039  | –0.024, 0.103  |  |

APE, average partial effect; CI, confidence interval; Coef. coefficient; Pr. probability; ref., reference



Web Table 12. Association between Subjective Economic Deterioration and Tooth Loss, Instrumental Variable Analyses with 2SLS using Complete Case (n = 2,332), Iwanuma, Japan, 2010–2013

| Variables                                                                        | 2SLS first stage |                | 2SLS second stage |                |
|----------------------------------------------------------------------------------|------------------|----------------|-------------------|----------------|
|                                                                                  | Coef.            | 95%CI          | Coef.             | 95%CI          |
| Subjective economic deterioration:<br>no change/improved (1) to Became worse (3) |                  |                | 0.559             | (0.002, 1.115) |
| Distance from coastline (km <sup>-1</sup> ) <sup>a</sup>                         | 0.307            | 0.249, 0.366   |                   |                |
| Sex                                                                              |                  |                |                   |                |
| Men                                                                              | ref.             | –              | ref.              | –              |
| Women                                                                            | –0.075           | –0.119, –0.032 | –0.124            | –0.283, 0.036  |
| Age (years-old)                                                                  |                  |                |                   |                |
| 65–69                                                                            | ref.             | –              | ref.              | –              |
| 70–74                                                                            | –0.046           | –0.099, 0.006  | 0.205             | 0.015, 0.396   |
| 75–79                                                                            | –0.084           | –0.144, –0.023 | 0.176             | –0.049, 0.401  |
| 80–84                                                                            | –0.115           | –0.194, –0.035 | 0.282             | –0.004, 0.568  |
| ≥85                                                                              | –0.174           | –0.291, –0.058 | 0.713             | 0.354, 1.071   |
| Income before disaster (tertile categories)                                      |                  |                |                   |                |
| Low                                                                              | ref.             | –              | ref.              | –              |
| Middle                                                                           | –0.17            | –0.224, –0.117 | –0.08             | –0.293, 0.133  |
| High                                                                             | –0.188           | –0.242, –0.133 | –0.069            | –0.292, 0.154  |
| Years of education                                                               |                  |                |                   |                |
| ≤9                                                                               | ref.             | –              | ref.              | –              |
| 10–12                                                                            | –0.097           | –0.149, –0.044 | –0.004            | –0.201, 0.194  |
| ≥13                                                                              | –0.137           | –0.200, –0.075 | 0.081             | –0.159, 0.322  |
| Comorbid conditions before disaster                                              |                  |                |                   |                |
| No                                                                               | ref.             | –              | ref.              | –              |
| Yes                                                                              | 0.022            | –0.023, 0.068  | –0.086            | –0.247, 0.075  |
| Loss of loved ones by the disaster                                               |                  |                |                   |                |
| No lost                                                                          | ref.             | –              | ref.              | –              |
| Lost                                                                             | 0.126            | 0.081, 0.171   | –0.089            | –0.227, 0.049  |
| Psychological distress after disaster                                            |                  |                |                   |                |
| None                                                                             | ref.             | –              | ref.              | –              |
| Moderate                                                                         | 0.167            | 0.121, 0.213   | 0.055             | –0.135, 0.245  |
| Severe                                                                           | 0.375            | 0.267, 0.484   | 0.053             | –0.360, 0.467  |

2SLS, two-step least-square; CI, confidence interval ; Coef. coefficient

<sup>a</sup> F-statistic in first stage=144.33

Web Table 13. Association between Housing damage and Tooth Loss, Instrumental Variable Analyses with 2SLS using Complete Case (n = 2,332), Iwanuma, Japan, 2010–2013

| Variables                                                                        | 2SLS first stage |                | 2SLS second stage |                |
|----------------------------------------------------------------------------------|------------------|----------------|-------------------|----------------|
|                                                                                  | Coef.            | 95%CI          | Coef.             | 95%CI          |
| Subjective economic deterioration:<br>no change/improved (1) to Became worse (3) |                  |                | 0.110             | (0.000, 0.220) |
| Distance from coastline (km <sup>-1</sup> ) <sup>a</sup>                         | 1.533            | 1.450, 1.615   |                   |                |
| Sex                                                                              |                  |                |                   |                |
| Men                                                                              | ref.             | –              | ref.              | –              |
| Women                                                                            | –0.001           | –0.062, 0.060  | –0.167            | –0.319, –0.014 |
| Age (years-old)                                                                  |                  |                |                   |                |
| 65–69                                                                            | ref.             | –              | ref.              | –              |
| 70–74                                                                            | –0.074           | –0.149, –0.000 | 0.188             | –0.000, 0.376  |
| 75–79                                                                            | –0.030           | –0.115, 0.056  | 0.132             | –0.085, 0.350  |
| 80–84                                                                            | –0.056           | –0.169, 0.056  | 0.222             | –0.052, 0.496  |
| ≥85                                                                              | –0.063           | –0.227, 0.102  | 0.620             | 0.281, 0.959   |
| Income before disaster (tertile categories)                                      |                  |                |                   |                |
| Low                                                                              | ref.             | –              | ref.              | –              |
| Middle                                                                           | –0.013           | –0.088, 0.062  | –0.176            | –0.360, 0.009  |
| High                                                                             | 0.036            | –0.041, 0.113  | –0.180            | –0.369, 0.008  |
| Years of education                                                               |                  |                |                   |                |
| ≤9                                                                               | ref.             | –              | ref.              | –              |
| 10–12                                                                            | –0.090           | –0.164, –0.016 | –0.047            | –0.229, 0.136  |
| ≥13                                                                              | –0.080           | –0.168, 0.008  | 0.012             | –0.205, 0.229  |
| Comorbid conditions before disaster                                              |                  |                |                   |                |
| No                                                                               | ref.             | –              | ref.              | –              |
| Yes                                                                              | 0.037            | –0.027, 0.102  | –0.078            | –0.238, 0.081  |
| Loss of loved ones by the disaster                                               |                  |                |                   |                |
| No lost                                                                          | ref.             | –              | ref.              | –              |
| Lost                                                                             | 0.164            | 0.101, 0.227   | –0.062            | –0.224, 0.101  |
| Psychological distress after disaster                                            |                  |                |                   |                |
| None                                                                             | ref.             | –              | ref.              | –              |
| Moderate                                                                         | 0.143            | 0.078, 0.208   | 0.135             | –0.026, 0.295  |
| Severe                                                                           | 0.231            | 0.078, 0.384   | 0.234             | –0.115, 0.583  |

2SLS, two-step least-square; CI, confidence interval ; Coef. coefficient

<sup>a</sup> F-statistic in first stage=1622.93
